# Supplementary material for: Inter-locus as well as intra-locus heterogeneity in LINE-1 promoter methylation in common human cancers suggests selective demethylation pressure at specific CpGs
Source: PubMed Central journal article supplement (PMC4367886; doi:10.1186/s13148-015-0051-y), 2015-03-01

A)

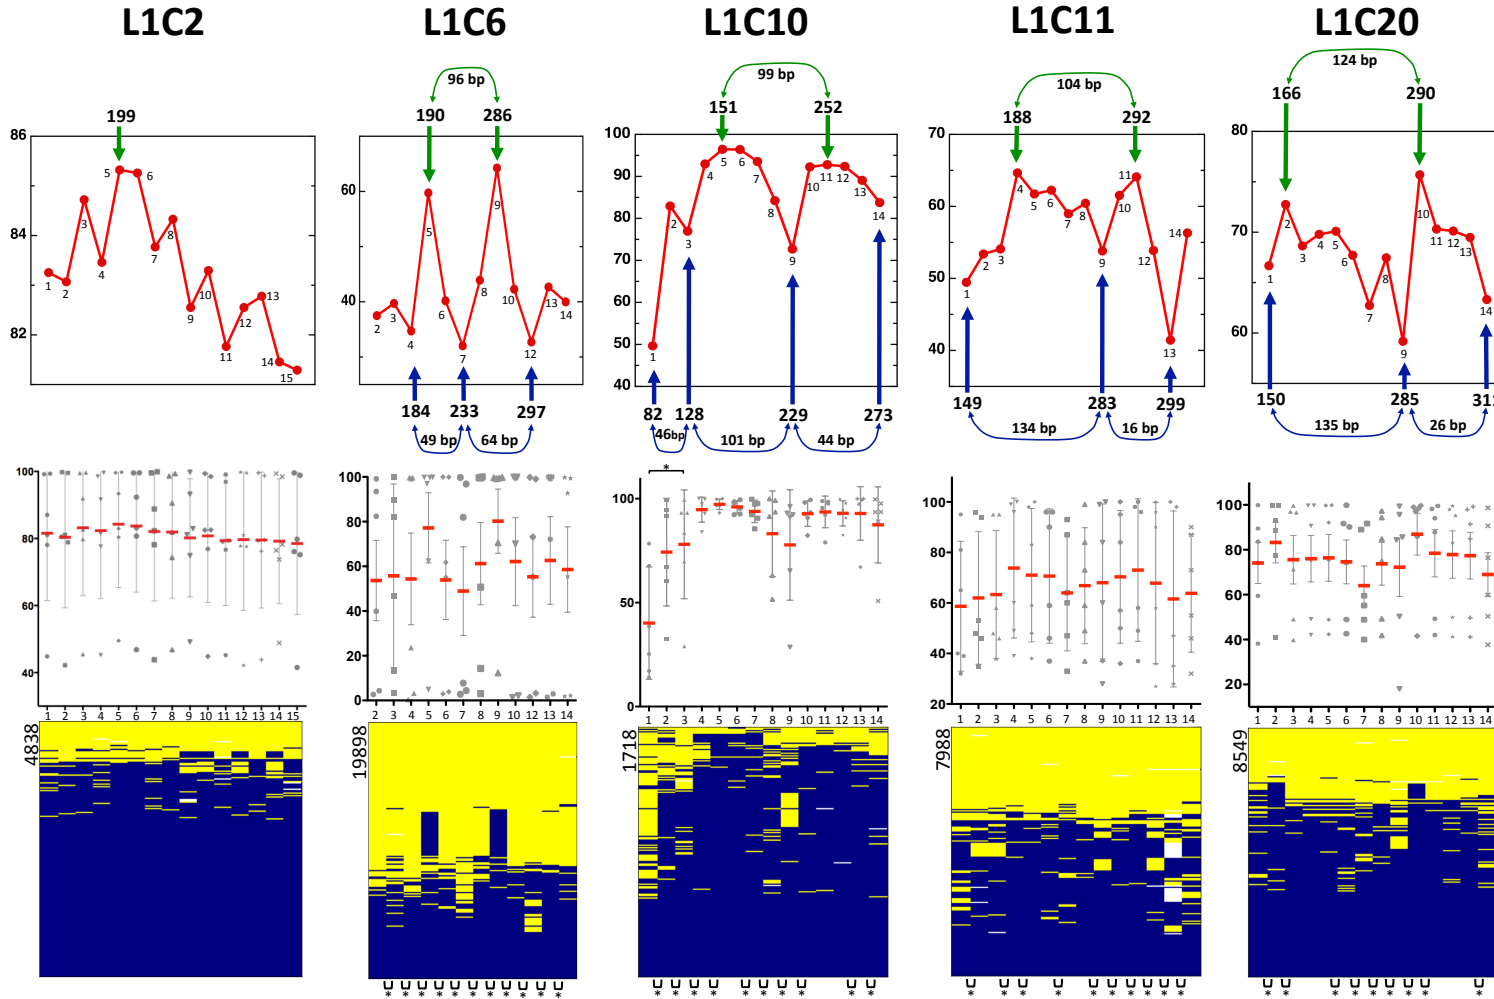

B)

L1X1

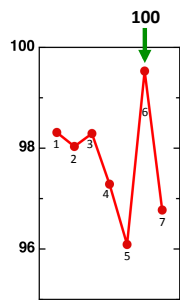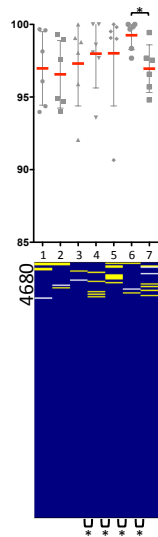

L1X3

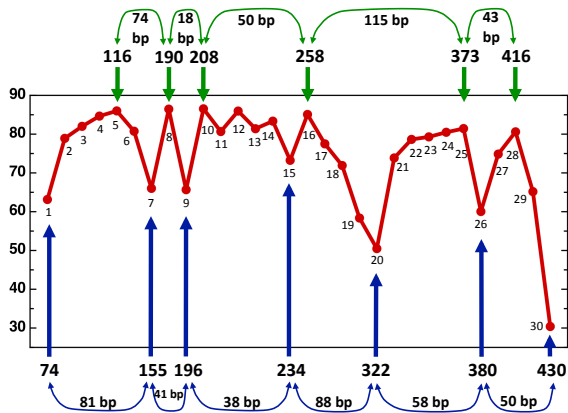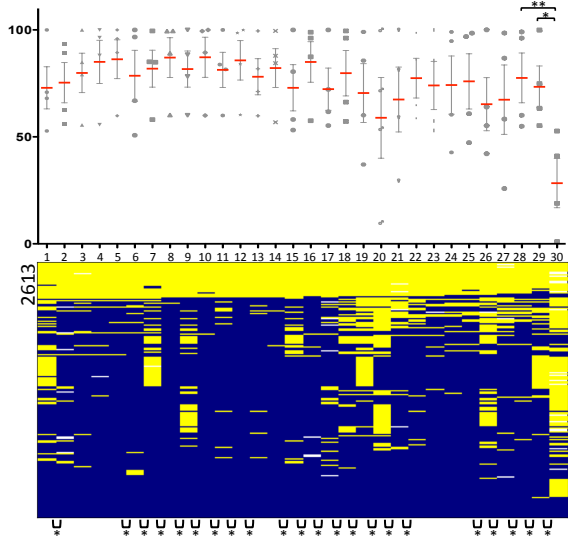

L1X4

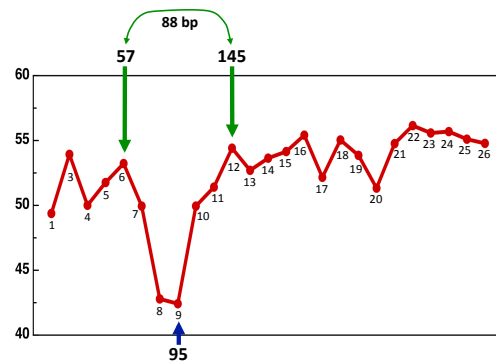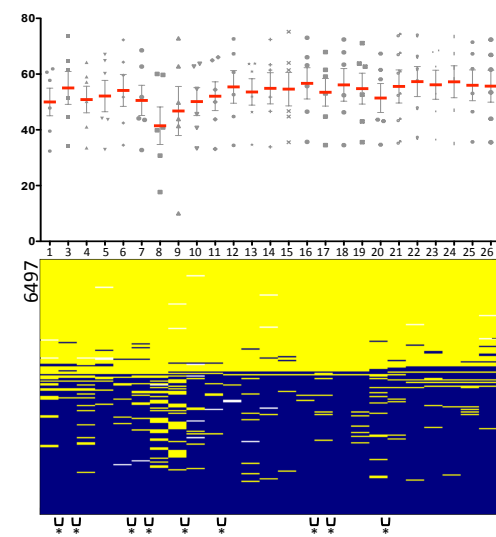

L1X5

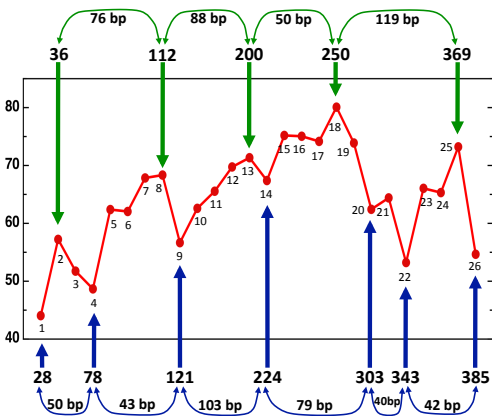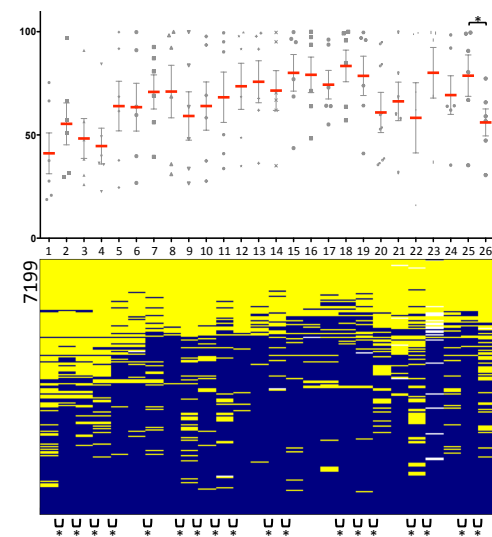

B) Continued

L1X6

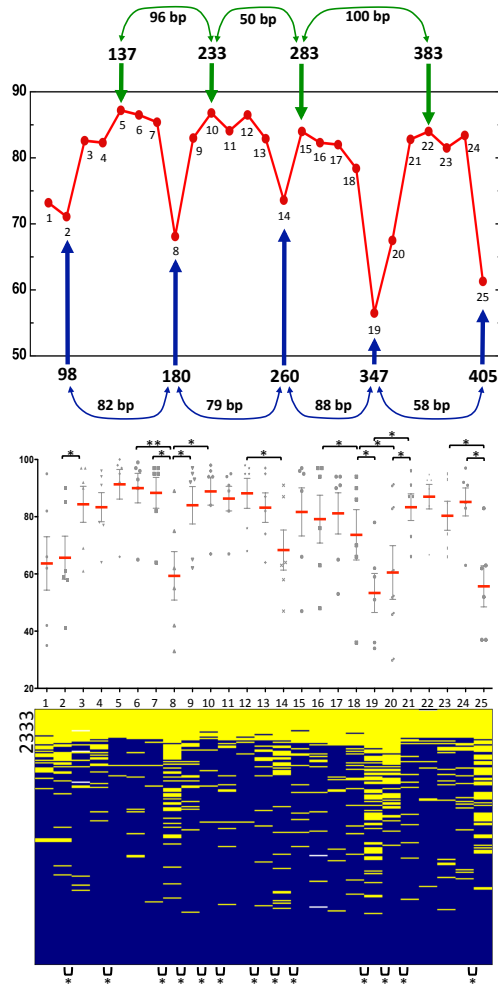

L1X8

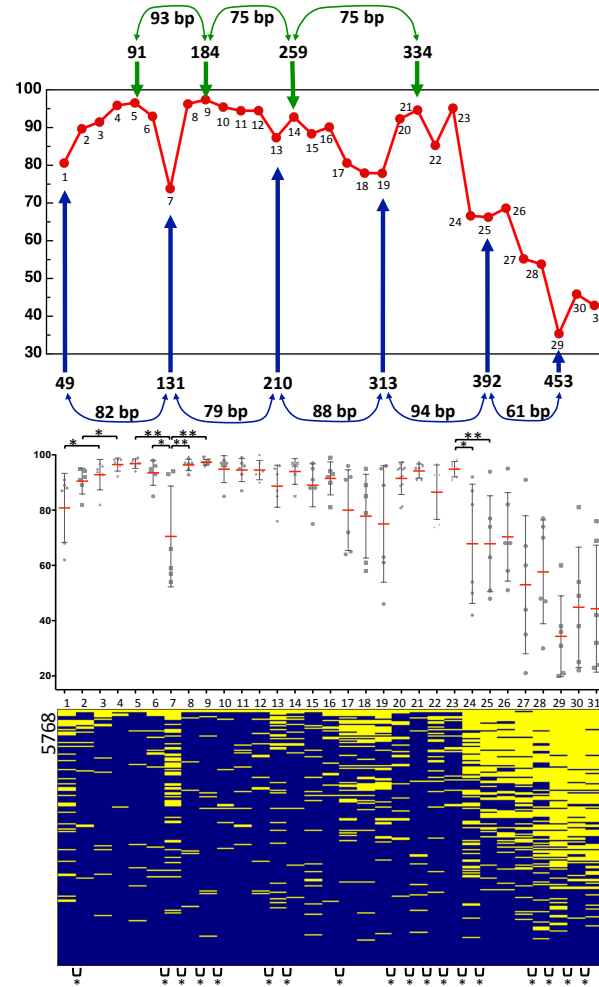

Supplement: 13148_2015_51_MOESM12_ESM.pdf [file 13148_2015_51_MOESM12_ESM.pdf]
