# Supplementary material for: Inter-locus as well as intra-locus heterogeneity in LINE-1 promoter methylation in common human cancers suggests selective demethylation pressure at specific CpGs
Source: PubMed Central journal article supplement (PMC4367886; doi:10.1186/s13148-015-0051-y), 2015-03-01
Supplement: 13148_2015_51_MOESM13_ESM.pdf [file 13148_2015_51_MOESM13_ESM.pdf]

## A) Per Patient

### Autosomal

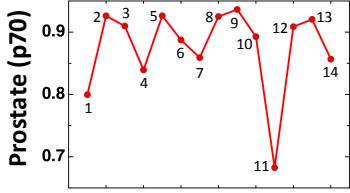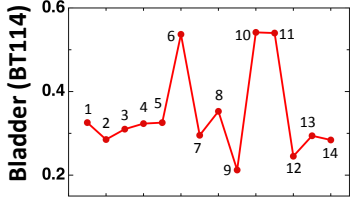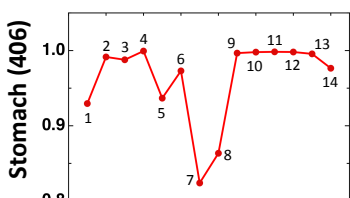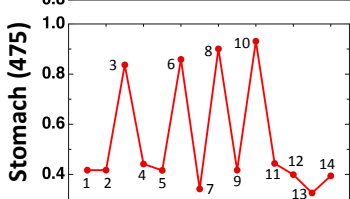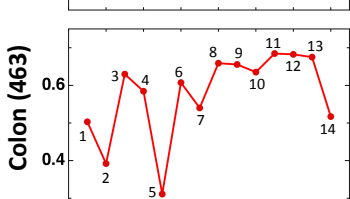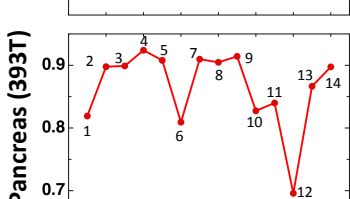

### X-linked

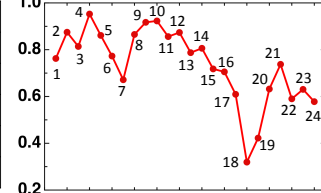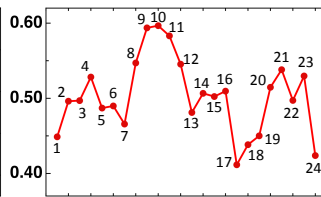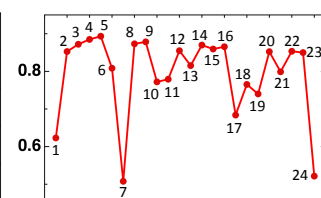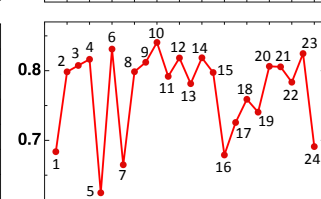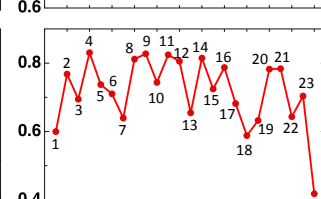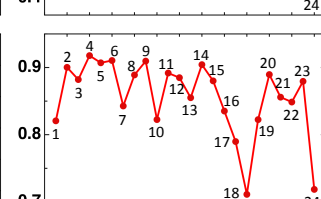

Numbering of CpG sites according to L1C20

Numbering of CpG sites according to L1X8

## B) Per Region

### Autosomal

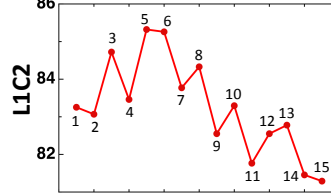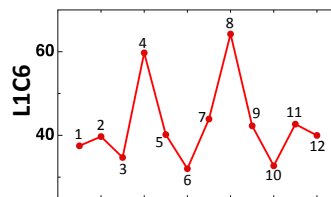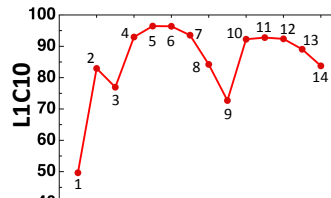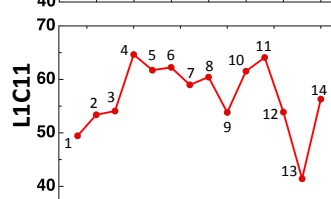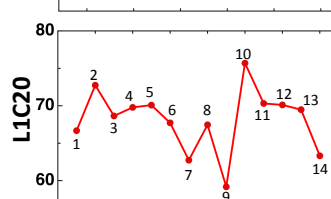

### X-linked

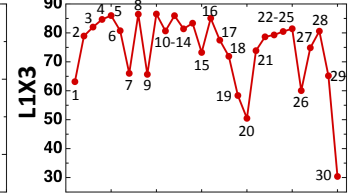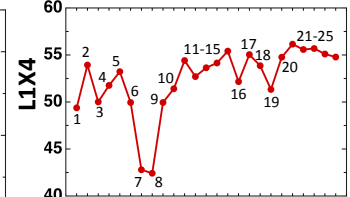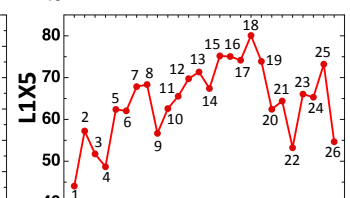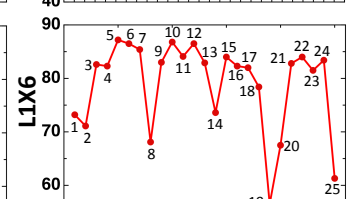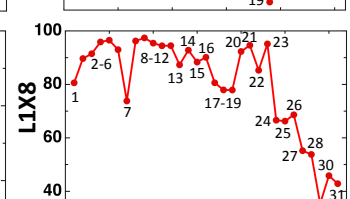

Numbering of CpG sites according to individual sequence
